# Supplementary material for: Controlled Synthesis of ZrO2 Nanoparticles with Tailored Size, Morphology and Crystal Phases via Organic/Inorganic Hybrid Films
Source: Sci Rep. 2018 Feb 27;8:3695. doi: 10.1038/s41598-018-22088-0 (PMC5829248; doi:10.1038/s41598-018-22088-0)
Supplement: Supplementary file 1 — Supplementary Information [file 41598_2018_22088_MOESM1_ESM.pdf]

# **Controlled Synthesis of ZrO<sub>2</sub> Nanoparticles with Tailored Size, Morphology and Crystal phases via Organic/Inorganic Hybrid Films**

Ali Bumajdad<sup>a\*</sup>, Ahmed Abdel Nazeer<sup>a</sup>, Fakhreia Al Sagheer<sup>a</sup>, Shamsun Nahar<sup>a</sup>, Mohamed I. Zaki<sup>b</sup>

<sup>a</sup>*Chemistry Department, Faculty of Science, Kuwait University, P.O. Box: 5969, Safat 13060, Kuwait.*

<sup>b</sup>*Chemistry Department, Faculty of Science, Minia University, El-Minia 61519, Egypt.*

**\* Corresponding Author:**

Ali Bumajdad

Professor of Physical chemistry

Chemistry Department,

Faculty of Science,

Kuwait University

P.O. Box 5969,

Safat 13060,

Kuwait

E-mail: [a.bumajdad@ku.edu.kw](mailto:a.bumajdad@ku.edu.kw)

## Results and discussion

### Thermal genesis of zirconia NPs

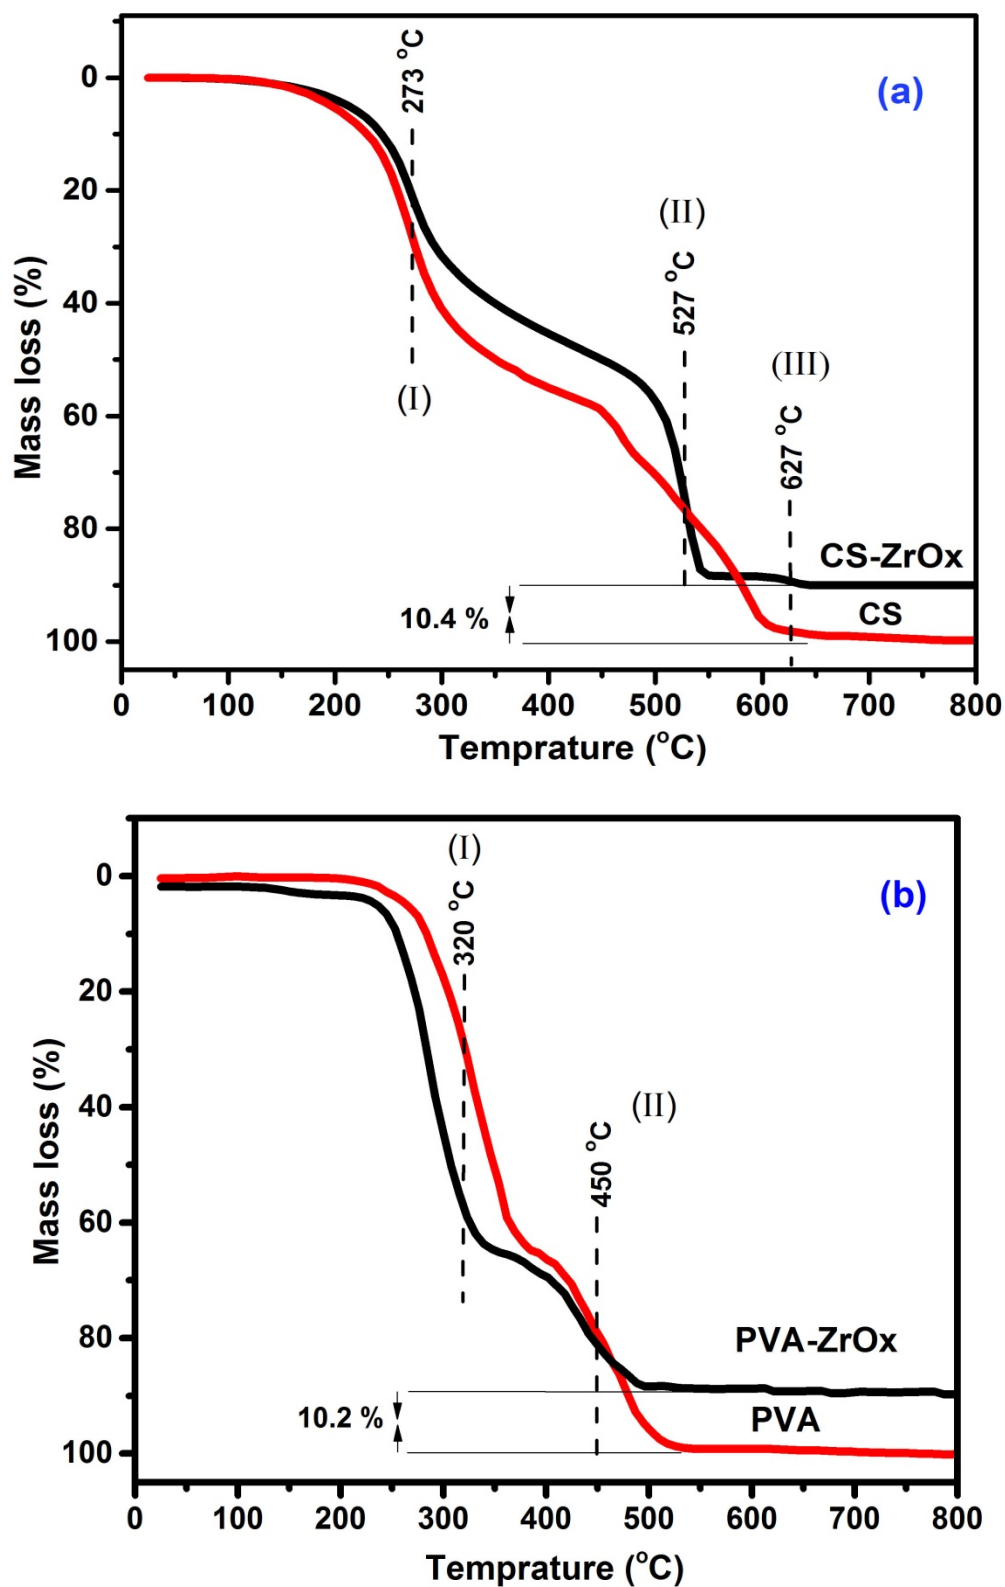

**Figure S1** TG curves obtained for (a) CS-ZrOx and pure CS, and (b) PVA-ZrOx and pure PVA, upon heating test samples at 10 °C/min in a dynamic atmosphere (50 cm<sup>3</sup>/min) of synthetic air.

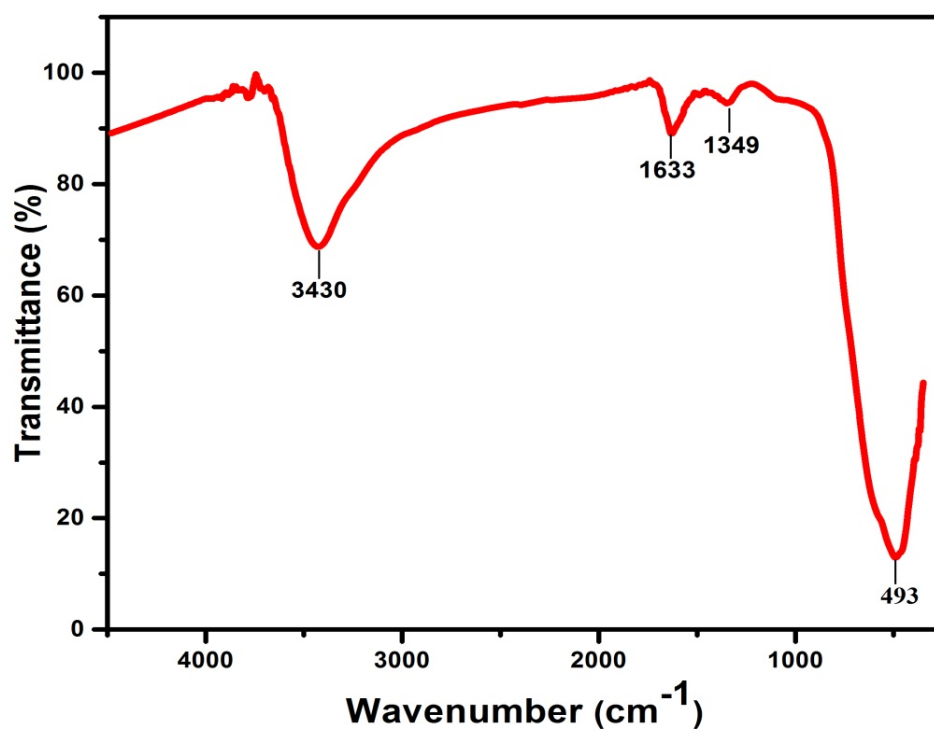

**Figure S2** FT-IR spectrum obtained for the calcination product of CS-ZrO<sub>x</sub> hybrid film at 450° C for 9 h.

## Surface characteristics of zirconia NPs

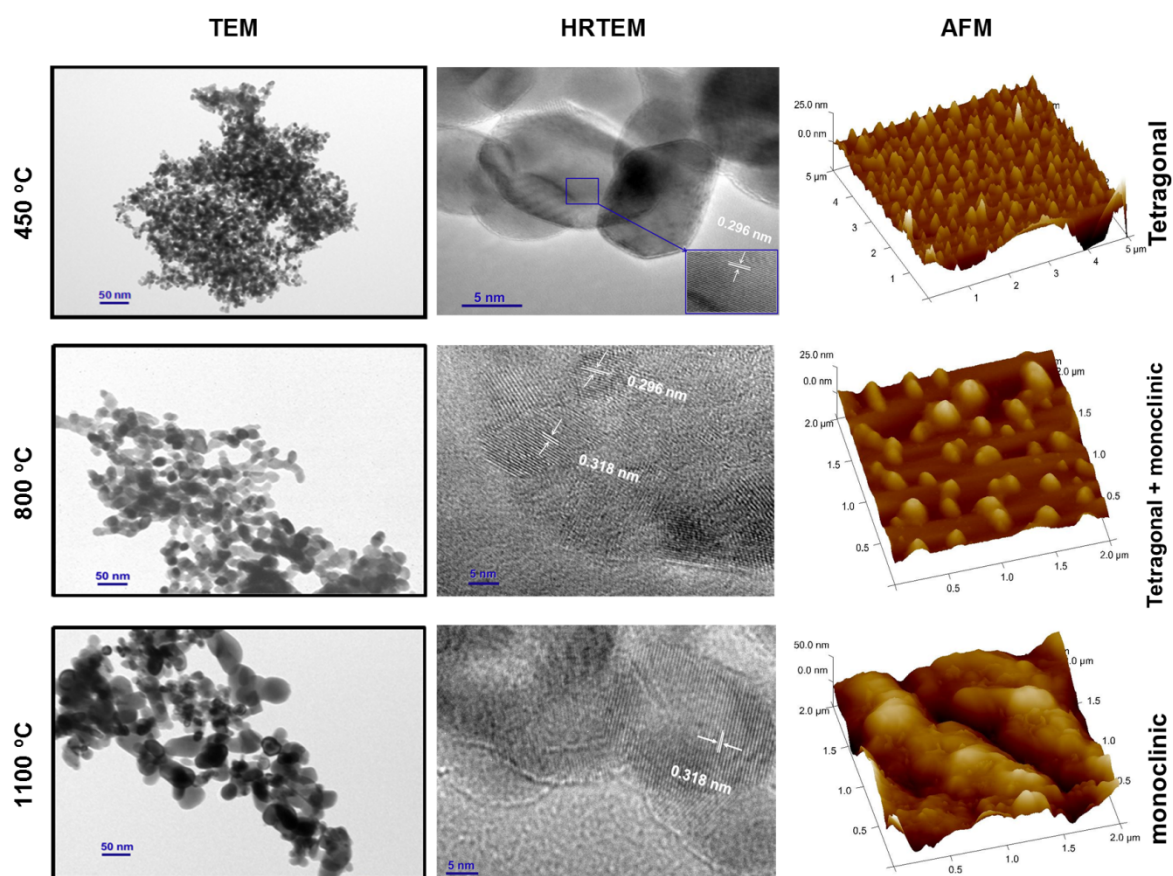

**Figure S3.** TEM, HRTEM and AFM images obtained for ZrO<sub>2</sub> NPs recovered from PVA-ZrO<sub>x</sub> hybrid film at the calcination temperatures indicated.

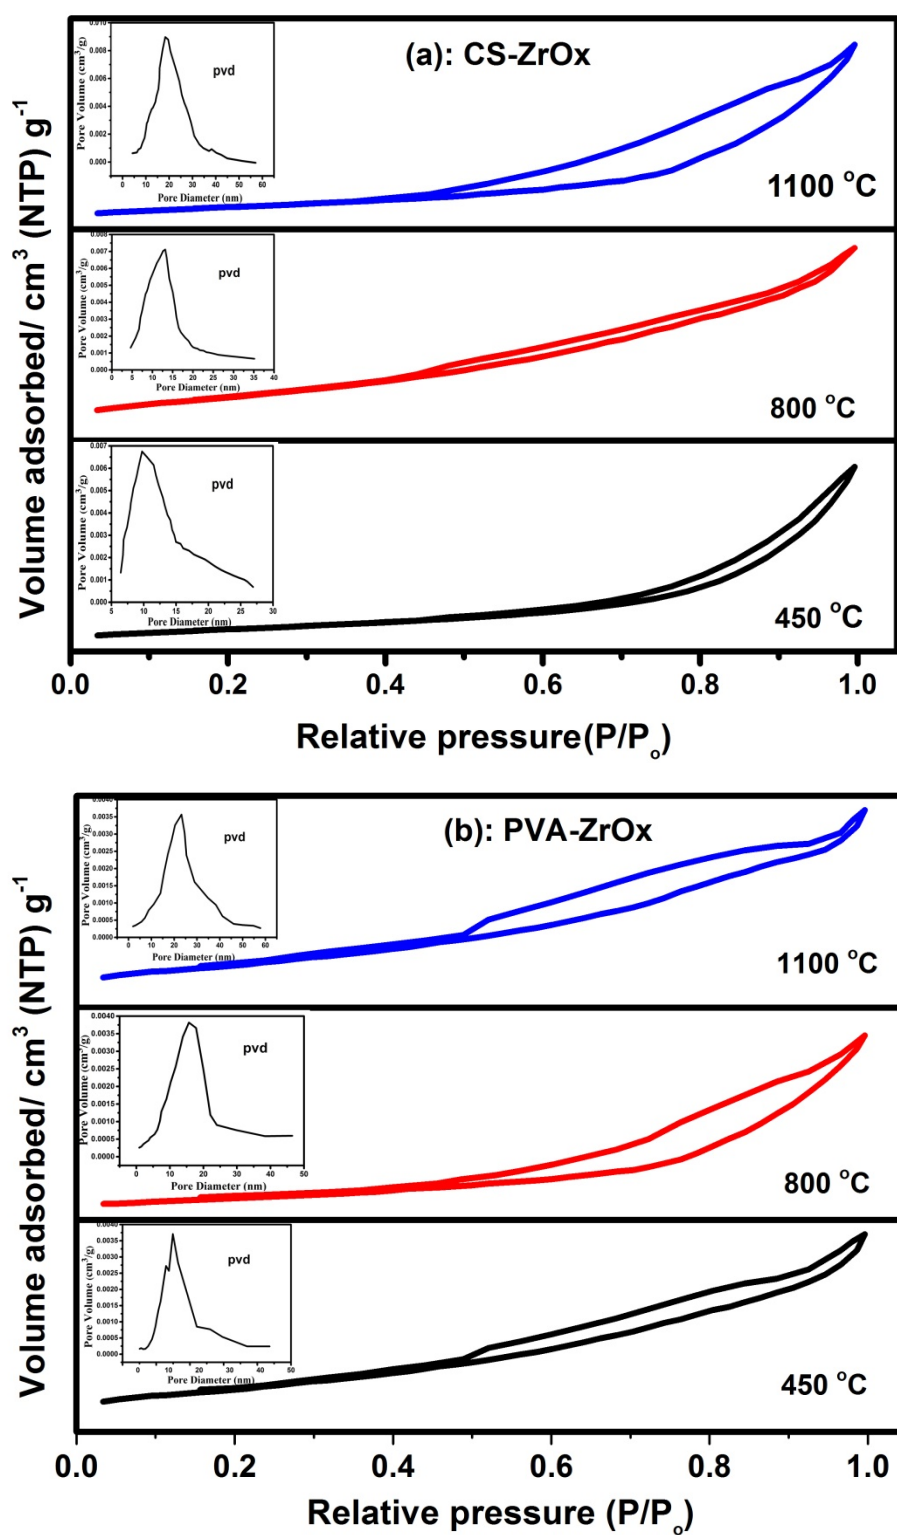

**Figure S4.**  $N_2$  adsorption-desorption isotherm determined on ZrO<sub>2</sub> NPs recovered from CS-ZrOx (a) and PVA-ZrOx (b) hybrid films at the calcination temperatures indicated. Inset figures display corresponding pvd curves.

**Table S1:** Binding energies values ( $\pm 0.02$  eV) obtained by curve fitting of XPS Zr3d and O1s spectra measured on surfaces of ZrO<sub>2</sub> NPs recovered from CS-ZrO<sub>x</sub> and PVA-ZrO<sub>x</sub> hybrid films at the calcination temperatures indicated.

| Hybrid film          | Calcination temp./°C | Zr3d <sub>5/2, 3/2</sub> /eV | O1s /eV      |
|----------------------|----------------------|------------------------------|--------------|
| CS-ZrO <sub>x</sub>  | 450                  | 182.0, 184.4                 | 530.0, 531.5 |
|                      | 800                  | 181.9, 184.3                 | 529.9, 531.4 |
|                      | 1100                 | 181.8, 184.4                 | 529.8, 531.3 |
| PVA-ZrO <sub>x</sub> | 450                  | 181.9, 184.3                 | 529.9, 531.4 |
|                      | 800                  | 181.8, 184.4                 | 529.8, 531.3 |
|                      | 1100                 | 181.7, 1.84.3                | 529.7, 531.3 |
